# Supplementary material for: TAS-120 Overcomes Resistance to ATP-Competitive FGFR Inhibitors in Patients with FGFR2 Fusion–Positive Intrahepatic Cholangiocarcinoma
Source: Oxford University Press journal article supplement (doi:10.1158/2159-8290.cd-19-0182), 2019-05-20
Supplement: 21598290cd190182-sup-216964_2_supp_5503222_pr3n6h.docx [file 21598290cd190182-sup-216964_2_supp_5503222_pr3n6h.docx]

**Supplemental Table 1**

| Name | Primer sequence |
| --- | --- |
| Human FGFR1 F | GGCTACAAGGTCCGTTATGCC |
| Human FGFR1 R | GATGCTGCCGTACTCATTCTC |
| Human FGFR1b F | GGAGGTGCTGACCCTGTTCAAT |
| Human FGFR1c F | GAGATGGAGGTGCTTCACTTAAGAAA |
| Human FGFR1bc R | GGCCCCTGTGCAATAGATGATGA |
| Human FGFR2 F | GGACCCAAAATGGGAGTTTC |
| Human FGFR2 R | ACCACTTGCCCAAAGCAA |
| Human FGFR3 F | TACTCCTTCGACACCTGCAA |
| Human FGFR3 R | CACTTCTGGGAGGCCAAGTA |
| Human FGF20 F | GGGACTGGTCAGTATTAGAGGT |
| Human FGF20 R | CTCTTGGAGTTCCGTCTTTGTT |
